# Supplementary material
Source: Research Square preprint supplement (doi:10.21203/rs.3.rs-9057292/v1)
Supplement: Supplementary file 1 [file 563cd9217880d8c707609a53.docx]

Additional Table 1 Ratio of Visits to Patients and Differences in Hospital Utilization

| phase | hospital_level | insurance type | | | | | |  |
| --- | --- | --- | --- | --- | --- | --- | --- | --- |
| UEBMI | | | URRBMI | | | Difference |
| **visits** | **uni_patients** | **visits_patient** | **visits** | **uni_patients** | **visits_patient** |  |
| Policy 1  Phase | 1 | 14400 | 13831 | 1.041139 | 118085 | 87401 | 1.351071 | 0.31 |
| 2 | 42574 | 40801 | 1.043455 | 196809 | 177101 | 1.111281 | 0.07 |
| 3 | 89267 | 73059 | 1.221848 | 96817 | 78553 | 1.232505 | 0.01 |
| Policy 2 Phase | 1 | 21847 | 20259 | 1.078385 | 151962 | 96466 | 1.575291 | 0.50 |
| 2 | 55529 | 51646 | 1.075185 | 231972 | 210457 | 1.10223 | 0.03 |
| 3 | 106799 | 87771 | 1.216791 | 118737 | 95279 | 1.246203 | 0.03 |
| Policy 3 Phase | 1 | 17348 | 16235 | 1.068556 | 114958 | 76412 | 1.50445 | 0.44 |
| 2 | 37405 | 35436 | 1.055565 | 165965 | 154881 | 1.071565 | 0.02 |
| 3 | 76165 | 64587 | 1.179262 | 89895 | 74417 | 1.20799 | 0.03 |
| Difference |  |  |  | +0.179 |  |  | +0.197 |  |

Additional Table2 Impact of the DIP Reform on Decomposed Admissions

|  | UEBMI | | | URRBMI | | |
| --- | --- | --- | --- | --- | --- | --- |
| variable | primary | secondary | tertiary | primary | secondary | tertiary |
| (Intercept) | -8.083*** (1.196) | -6.720*** (0.860) | -5.589*** (0.495) | -7.773*** (0.343) | -5.309*** (0.207) | -4.912*** (0.211) |
| time | 0.021 (0.012) | 0.001 (0.009) | -0.007 (0.005) | 0.022*** (0.003) | 0.000 (0.002) | 0.004 (0.002) |
| policy2 | 0.839 (1.718) | -1.644 (1.580) | -1.233 (1.007) | -0.160 (0.468) | -4.663*** (0.610) | -1.140391 |
| policy3 | 0.510 (3.492) | -0.049 (4.342) | 2.463 (2.664) | 4.559*** (0.918) | 5.056** (1.819) | 2.417 (2.130) |
| policy2_time | -0.012 (0.014) | 0.009 (0.013) | 0.007 (0.008) | -0.003 (0.004) | 0.022*** (0.004) | -0.003 (0.005) |
| policy3_time | -0.005 (0.019) | -0.003 (0.024) | -0.013 (0.015) | -0.029*** (0.005) | -0.033*** (0.010) | -0.014 (0.012) |
| AIC | 1964.1 | 2208.8 | 5391.5 | 25275 | 20001 | 15947 |
| Null Deviance | 1957.5 | 2205.2 | 5413.5 | 25518 | 20780 | 17055 |
| Residual Deviance | 1952.1 | 2196.8 | 5379.5 | 25263 | 19989 | 15935 |

Additional Table**3**  Impact of the DIP Reform on 7-day readmissions

|  | UEBMI | | | URRBMI | | |
| --- | --- | --- | --- | --- | --- | --- |
| variable | primary | secondary | tertiary | primary | secondary | tertiary |
| (Intercept) | -6.230*** (0.257) | -4.328*** (0.201) | -5.252*** (0.204) | -5.049*** (0.064) | -3.872*** (0.077) | -5.251*** (0.149) |
| time | 0.036*** (0.003) | 0.007*** (0.002) | 0.009*** (0.002) | 0.032*** (0.001) | 0.007*** (0.001) | 0.015*** (0.001) |
| policy2 | 1.893*** (0.362) | -0.602 (0.396) | 1.042** (0.329) | 0.787*** (0.097) | -0.789*** (0.141) | 1.137*** (0.274) |
| policy3 | 1.663** (0.617) | 1.824 (1.108) | -0.449 (0.738) | 7.965*** (0.210) | 3.182*** (0.397) | 1.169 (0.664) |
| policy2_time | -0.024*** (0.003) | -0.003 (0.003) | -0.010*** (0.003) | -0.016*** (0.001) | 0.000 (0.001) | -0.017*** (0.002) |
| policy3_time | -0.010** (0.003) | -0.000072 | 0.003 (0.004) | -0.047*** (0.001) | -0.020*** (0.002) | -0.006 (0.004) |
| Null Deviance | 29,193 | 23,915 | 36,328 | 296,369 | 161,180 | 52,241 |
| Residual Deviance | 28,766 | 23,615 | 36,302 | 291,647 | 159,751 | 51,792 |
| AIC | 28,778 | 23,627 | 36,314 | 291,659 | 159,763 | 51,804 |

Additional Table4 Impact of the DIP Reform on high-RW

|  | UEBMI | | | URRBMI | | |
| --- | --- | --- | --- | --- | --- | --- |
| variable | primary | secondary | tertiary | primary | secondary | tertiary |
| (Intercept) | -2.976*** (0.307) | -0.322*** (0.075) | 0.007 (0.045) | -0.705*** (0.081) | 0.640*** (0.031) | 1.729*** (0.043) |
| time | -0.005 (0.003) | -0.010*** (0.001) | -0.007*** (0.0005) | -0.023*** (0.001) | -0.015*** (0.0003) | -0.019*** (0.0004) |
| policy2 | -0.747 (0.486) | -1.128*** (0.125) | -0.516*** (0.076) | -2.397*** (0.148) | -1.595*** (0.053) | -1.908*** (0.069) |
| policy3 | 3.242** (1.042) | 2.476*** (0.299) | 1.077*** (0.184) | 1.155** (0.376) | 2.386*** (0.128) | 1.247*** (0.161) |
| policy2_time | 0.007 (0.004) | 0.010*** (0.001) | 0.005*** (0.0006) | 0.022*** (0.001) | 0.015*** (0.0004) | 0.017*** (0.0006) |
| policy3_time | -0.018** (0.006) | -0.013*** (0.002) | -0.005*** (0.001) | -0.007** (0.002) | -0.013*** (0.0007) | -0.007*** (0.0009) |
| Null Deviance | 14,528 | 138,845 | 339,443 | 134,077 | 721,353 | 417,739 |
| Residual Deviance | 14,515 | 138,523 | 338,615 | 132,735 | 717,884 | 413,623 |
| AIC | 14,527 | 138,535 | 338,627 | 132,747 | 717,896 | 413,635 |

Additional Table5 Impact of the DIP Reform on low-RW

|  | UEBMI | | | URRBMI | | |
| --- | --- | --- | --- | --- | --- | --- |
| variable | primary | secondary | tertiary | primary | secondary | tertiary |
| (Intercept) | 0.643*** (0.111) | -1.093*** (0.068) | -2.259*** (0.062) | 0.795*** (0.038) | -1.362*** (0.035) | -1.597*** (0.061) |
| time | -0.001 (0.001) | 0.003*** (0.001) | 0.005*** (0.001) | -0.011*** (0.0004) | 0.001*** (0.0004) | -0.003*** (0.001) |
| policy2 | -0.182 (0.172) | 0.551*** (0.109) | 0.143 (0.098) | -0.986*** (0.062) | 0.051 (0.058) | -0.287** (0.107) |
| policy3 | 0.083 (0.374) | -1.538*** (0.254) | -0.882*** (0.231) | -1.307*** (0.141) | -2.924*** (0.136) | 1.049*** (0.283) |
| policy2_time | 0.001 (0.001) | -0.004*** (0.001) | -0.002 (0.001) | 0.0095*** (0.0005) | -0.001 (0.0005) | 0.001 (0.001) |
| policy3_time | 0.000 (0.002) | 0.0085*** (0.001) | 0.004** (0.001) | 0.0078*** (0.0008) | 0.0161*** (0.0008) | -0.0066*** (0.002) |
| Null Deviance | 70,530 | 171,494 | 235,469 | 520,519 | 637,676 | 207,777 |
| Residual Deviance | 70,502 | 171,391 | 235,149 | 519,048 | 636,925 | 206,403 |
| AIC | 70,514 | 171,403 | 235,161 | 519,060 | 636,937 | 206,415 |
